# Supplementary material
Source: Springer Nature journal article supplement (https://www.springerprofessional.de/resource/supplementary/13638_2013_912_MOESM9_ESM.pdf/11899200)

**a**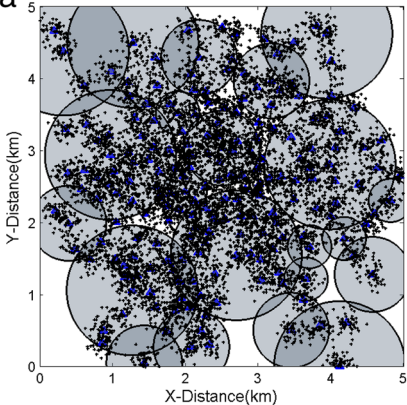**b**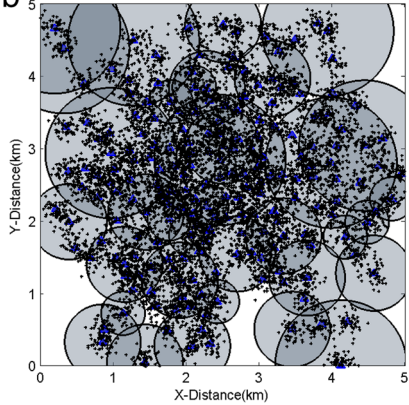**c**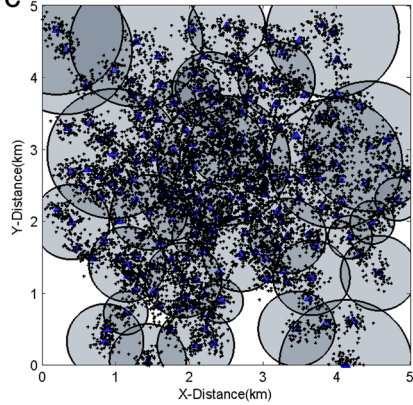

Supplement: MOESM9 [file 11899200]
